**CORRECTION**

# Distinct Wnt-driven primitive streak-like populations reflect *in vivo* lineage precursors

Anestis Tsakiridis, Yali Huang, Guillaume Blin, Stavroula Skylaki, Filip Wymeersch, Rodrigo Osorno, Costas Economou, Eleni Karagianni, Suling Zhao, Sally Lowell and Valerie Wilson

There was an error published in *Development* **141**, 1209-1221.

In Fig. 6, NM precursors were wrongly depicted as T(Bra)+Foxa2+ instead of T(Bra)+Sox2+. The corrected figure appears below. The authors apologise to readers for this mistake.

**Fig. 6**

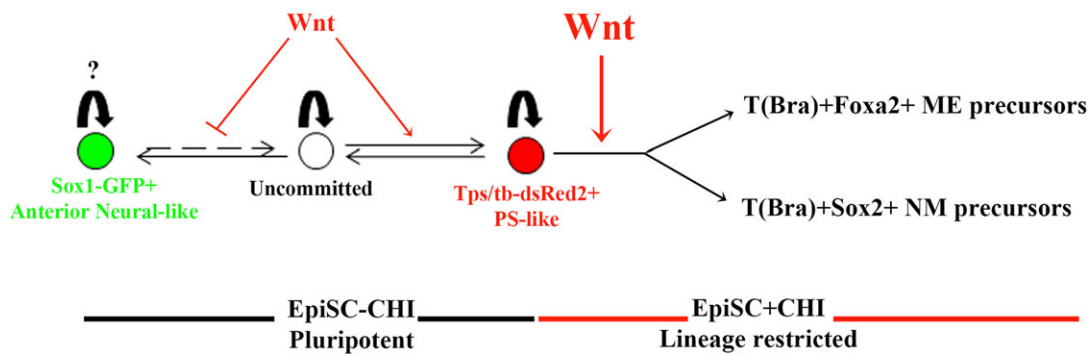

Source: https://cob.silverchair.com/dev/article-pdf/142/4/809/1840981/dev122093.pdf
